# Supplementary material
Source: PubMed Central journal article supplement (PMC7065356)
Supplement: NIHMS1543239-supplement-1.pdf [file NIHMS1543239-supplement-1.pdf]

Supplemental figure 1. Changes of tTG titers between initial and second testing in subjects with initially positive tTGA. A. The changes of tTGA in adults with persistently positive tTGA at the initial and second testing are depicted. Half of them had increased titers of tTGA in the second testing. B. The tTGA titers were all normalized in the second testing.

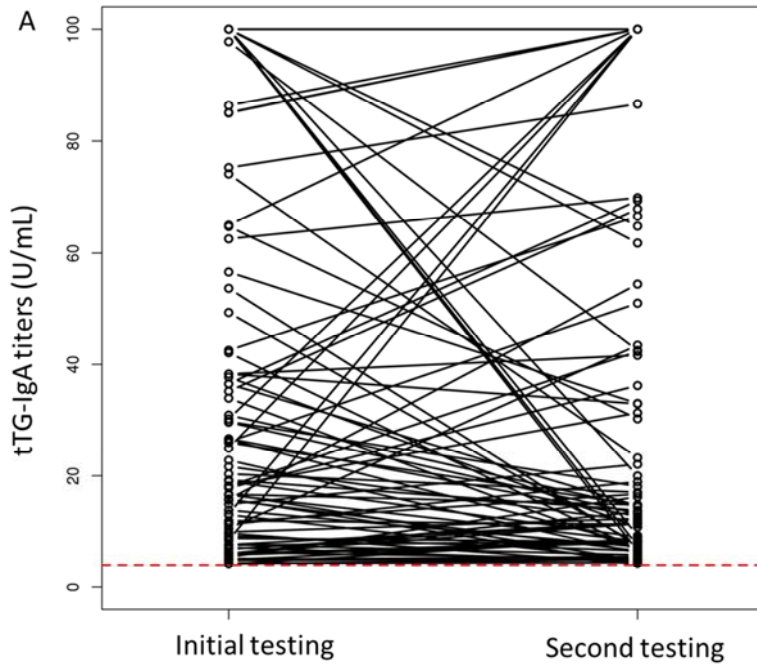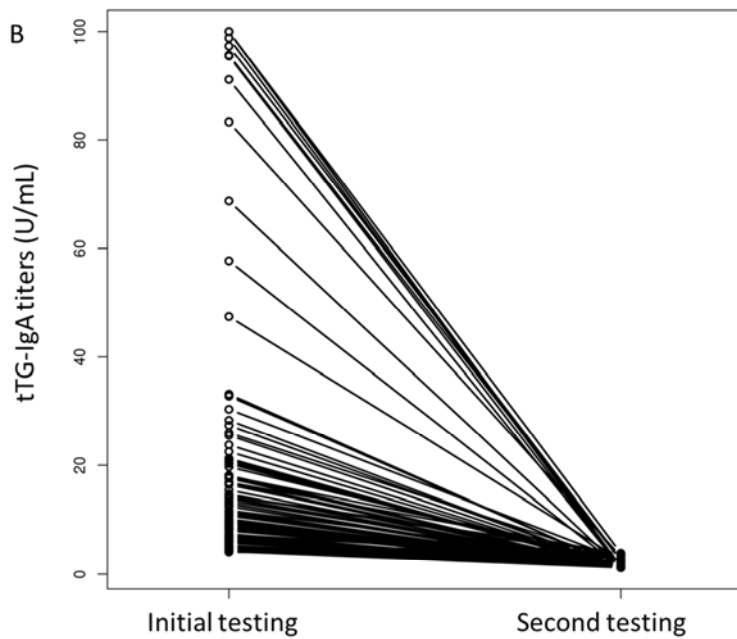

Supplemental table 1. Comparison between those who only had initial testing and subjects with initial and second testing.

|                                           | Subjects not<br>in Retest Study<br>(N=32,123) | Subjects in<br>Retest Study<br>(N=15,551) | Total<br>(N=47,674) | p value             |
|-------------------------------------------|-----------------------------------------------|-------------------------------------------|---------------------|---------------------|
| <b>Age at Original Sample Collection</b>  |                                               |                                           |                     | <0.001 <sup>a</sup> |
| Mean (SD), years                          | 46.8 (19.9)                                   | 47.0 (13.8)                               | 46.9 (18.1)         |                     |
| Median (IQR), years                       | 42.9 (30.1, 62.6)                             | 46.5 (37.0, 57.6)                         | 44.7 (32.0, 60.0)   |                     |
| <b>Gender</b>                             |                                               |                                           |                     | <0.001 <sup>b</sup> |
| Male, n (%)                               | 14052 (43.7%)                                 | 6497 (41.8%)                              | 20549 (43.1%)       |                     |
| Female, n (%)                             | 18071 (56.3%)                                 | 9054 (58.2%)                              | 27125 (56.9%)       |                     |
| <b>tTGA titers at the initial testing</b> |                                               |                                           |                     | <0.001 <sup>a</sup> |
| Mean (SD), U/mL                           | 1.6 (4.9)                                     | 1.5 (4.1)                                 | 1.6 (4.6)           |                     |
| <b>tTGA results, n (%)</b>                |                                               |                                           |                     | 0.03 <sup>b</sup>   |
| tTGA < 4 U/mL (negative)                  | 31737 (98.8%)                                 | 15398 (99.0%)                             | 47135 (98.9%)       |                     |
| 4 ≤ tTGA < 40 U/mL (weak positive)        | 277 (0.9%)                                    | 120 (0.8%)                                | 397 (0.8%)          |                     |
| tTGA ≥ 40 U/mL (positive)                 | 109 (0.3%)                                    | 33 (0.2%)                                 | 142 (0.3%)          |                     |
| <b>Initial EMA positive, %</b>            | 323 (1.0%)                                    | 133 (0.9%)                                | 456 (1.0%)          | 0.06 <sup>b</sup>   |

Abbreviations: IQR, interquartile range; tTGA, tissue transglutaminase antibody; EMA, endomysial antibodies.

<sup>a</sup>Kruskal Wallis; <sup>b</sup>Chi-Square

Supplementary table 2. Characteristics of 6 patients with negative initial tTGA, who were subsequently diagnosed with celiac disease

|                                                       | Patient 1                                  | Patient 2                                  | Patient 3                                  | Patient 4                                  | Patient 5                 | Patient 6                                |
|-------------------------------------------------------|--------------------------------------------|--------------------------------------------|--------------------------------------------|--------------------------------------------|---------------------------|------------------------------------------|
| Gender                                                | Male                                       | Male                                       | Female                                     | Female                                     | Female                    | Female                                   |
| Age at initial testing                                | 51 years old                               | 64 years old                               | 49 years old                               | 29 years old                               | 44 years old              | 34 years old                             |
| tTG-IgA results at the initial testing                | Negative                                   | Negative                                   | Negative                                   | Negative                                   | Negative                  | Negative                                 |
| Intervals between initial serum samples and diagnosis | 9.5 years                                  | 9.0 years                                  | 7.6 years                                  | 5.8 years                                  | 1.2 years                 | 7.4 years                                |
| Age at diagnosis                                      | 61 years old                               | 73 years old                               | 48 years old                               | 26 years old                               | 38 years old              | 33 years old                             |
| Symptoms at diagnosis                                 | Diarrhea                                   | Diarrhea and Weight loss                   | IBS like symptoms including diarrhea       | Abdominal pain                             | Abdominal pain & diarrhea | Diarrhea, Weight loss                    |
| Histologic findings at diagnosis                      | Partial villous atrophy with increased IEL | Increased IEL             | Total villous atrophy with increased IEL |
| Respond to gluten-free diet (GFD)                     | Not following a GFD                        | Yes                                        | Yes                                        | Yes                                        | No                        | Yes                                      |
| Presence of autoimmune diseases                       | No                                         | No                                         | No                                         | No                                         | Yes                       | No                                       |
